# Supplementary material for: ATP synthase F1 subunits recruited to centromeres by CENP-A are required for male meiosis
Source: PubMed Central journal article supplement (PMC6045659; doi:10.1038/s41467-018-05093-9), 2018-07-13
Supplement: 41467_2018_5093_MOESM1_ESM.pdf [file 41467_2018_5093_MOESM1_ESM.pdf]

## Supplementary Information

ATP synthase F<sub>1</sub> subunits recruited to centromeres by CENP-A are required for male meiosis.

Collins et al.



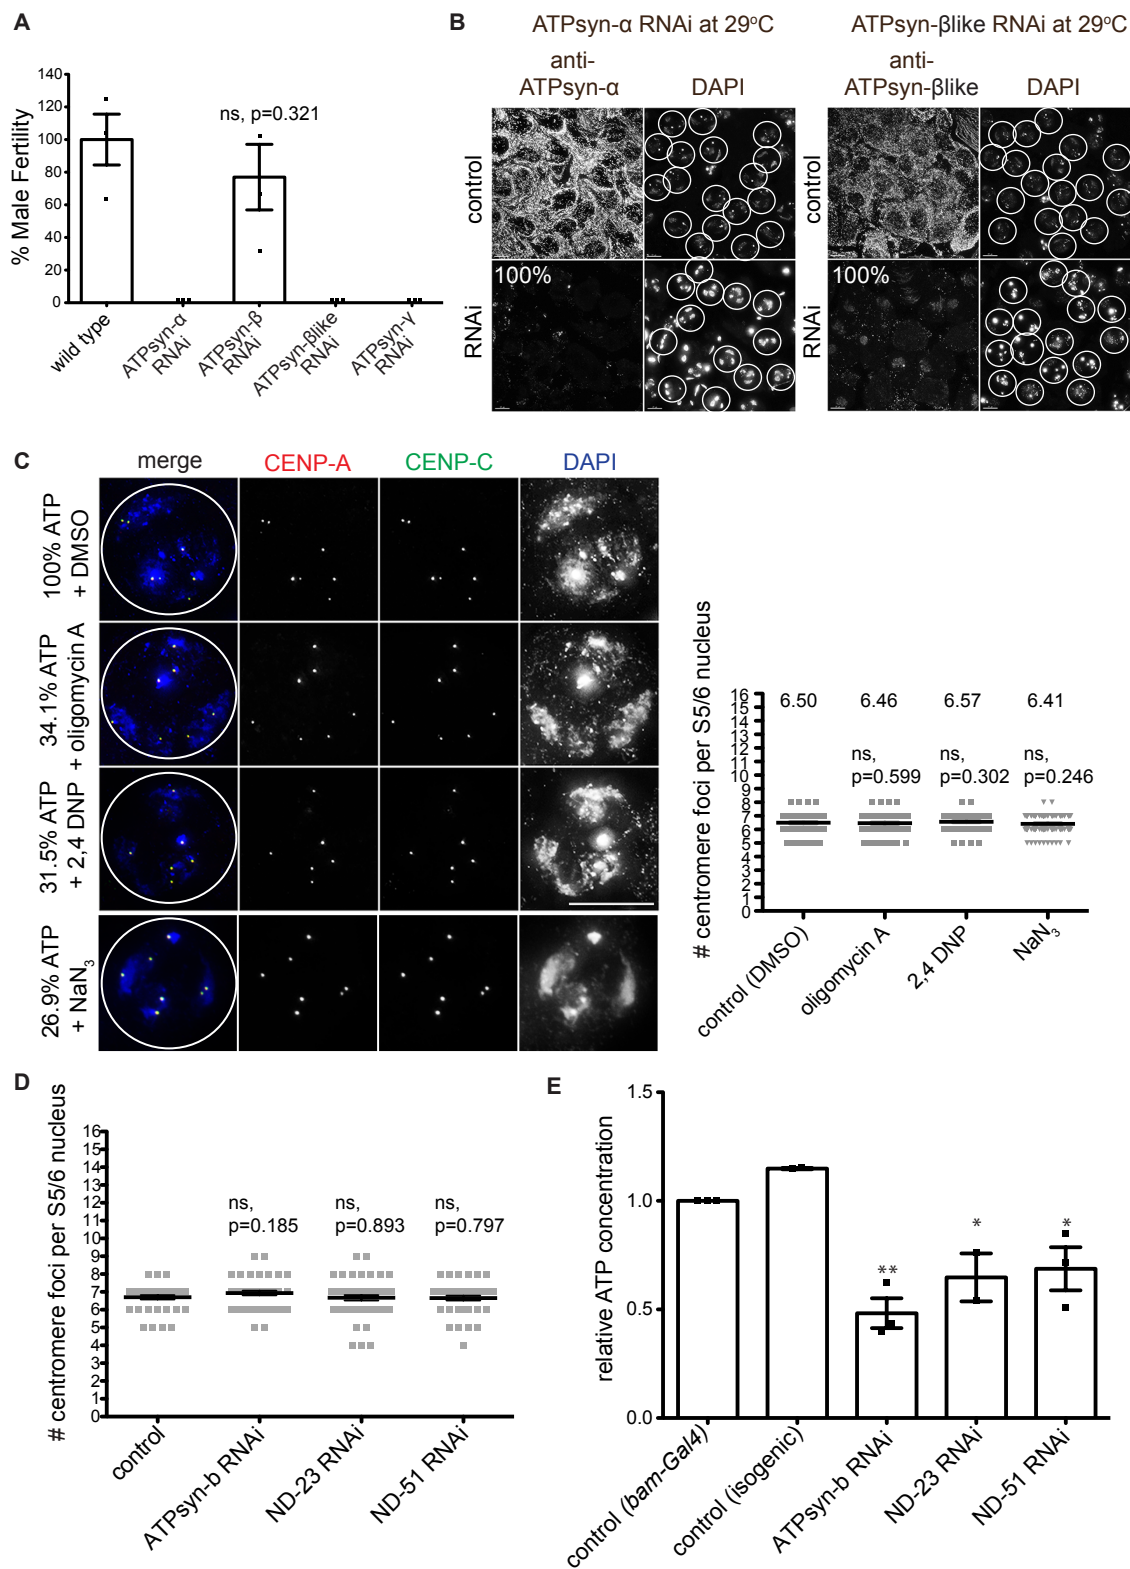

**Supplementary Figure 2. Effect of ATP reduction on sister centromere cohesion.**

**A:** Male fertility assay for control adults (TRiP isogenic) or adults in which ATPsyn- $\alpha$ , - $\beta$ , - $\beta$ like and - $\gamma$  is RNAi-depleted in testes ( $n=3$  individual RNAi experiments). Statistical significance was determined using an unpaired student's t-test. ns =  $p>0.05$ . Error bars = SEM.

**B:** Immuno-fluorescent micrograph of a control 16-cell cyst at 29°C or a cyst RNAi-depleted for ATPsyn- $\alpha$  stained with antibodies against ATPsyn- $\alpha$  (left) or RNAi-depleted for ATPsyn- $\beta$ like stained with antibodies against ATPsyn- $\beta$ like (right). DNA is stained with DAPI (blue). Nuclei are outlined with white circles. Scale bar = 15  $\mu\text{m}$ .

**C:** Left: Immuno-fluorescent micrograph of S5/6 nuclei treated with DMSO (control), oligomycin A, 2,4 DNP or  $\text{NaN}_3$  stained with antibodies against CENP-A (red) and CENP-C (green). DNA is stained with DAPI (blue). Percentages indicate measured ATP level in adult testes after drug treatments compared to the control ( $n=3$ ). Scale bar = 10  $\mu\text{m}$ . Right: Quantitation of the number of centromere foci per S5/6 nucleus treated with DMSO (control), oligomycin A, 2,4 DNP or  $\text{NaN}_3$  ( $n=150$  nuclei, pooled from three individual experiments). Statistical significance was determined using an unpaired student's t-test. ns =  $p>0.05$ . Error bars = SEM.

**D:** Quantitation of the number of centromere foci per control S5/6 nucleus or nuclei RNAi-depleted for ATPsyn-b, ND-23 or ND-51 ( $n=1$ ). Statistical significance was determined using an unpaired student's t-test. ns =  $p>0.05$ . Error bars = SEM.

**E:** Relative ATP concentration in control adult testes (isogenic, *bam-Gal4*) or testes RNAi-depleted for CENP-A, ATPsyn-b, ND-23 or ND-51. Experiments were carried out in triplicate and pooled from three individual RNAi experiments. Error bars = SEM. Unpaired t-test compares RNAi knockdowns to the isogenic control. \*\* =  $p<0.01$ , \* =  $p<0.05$ .

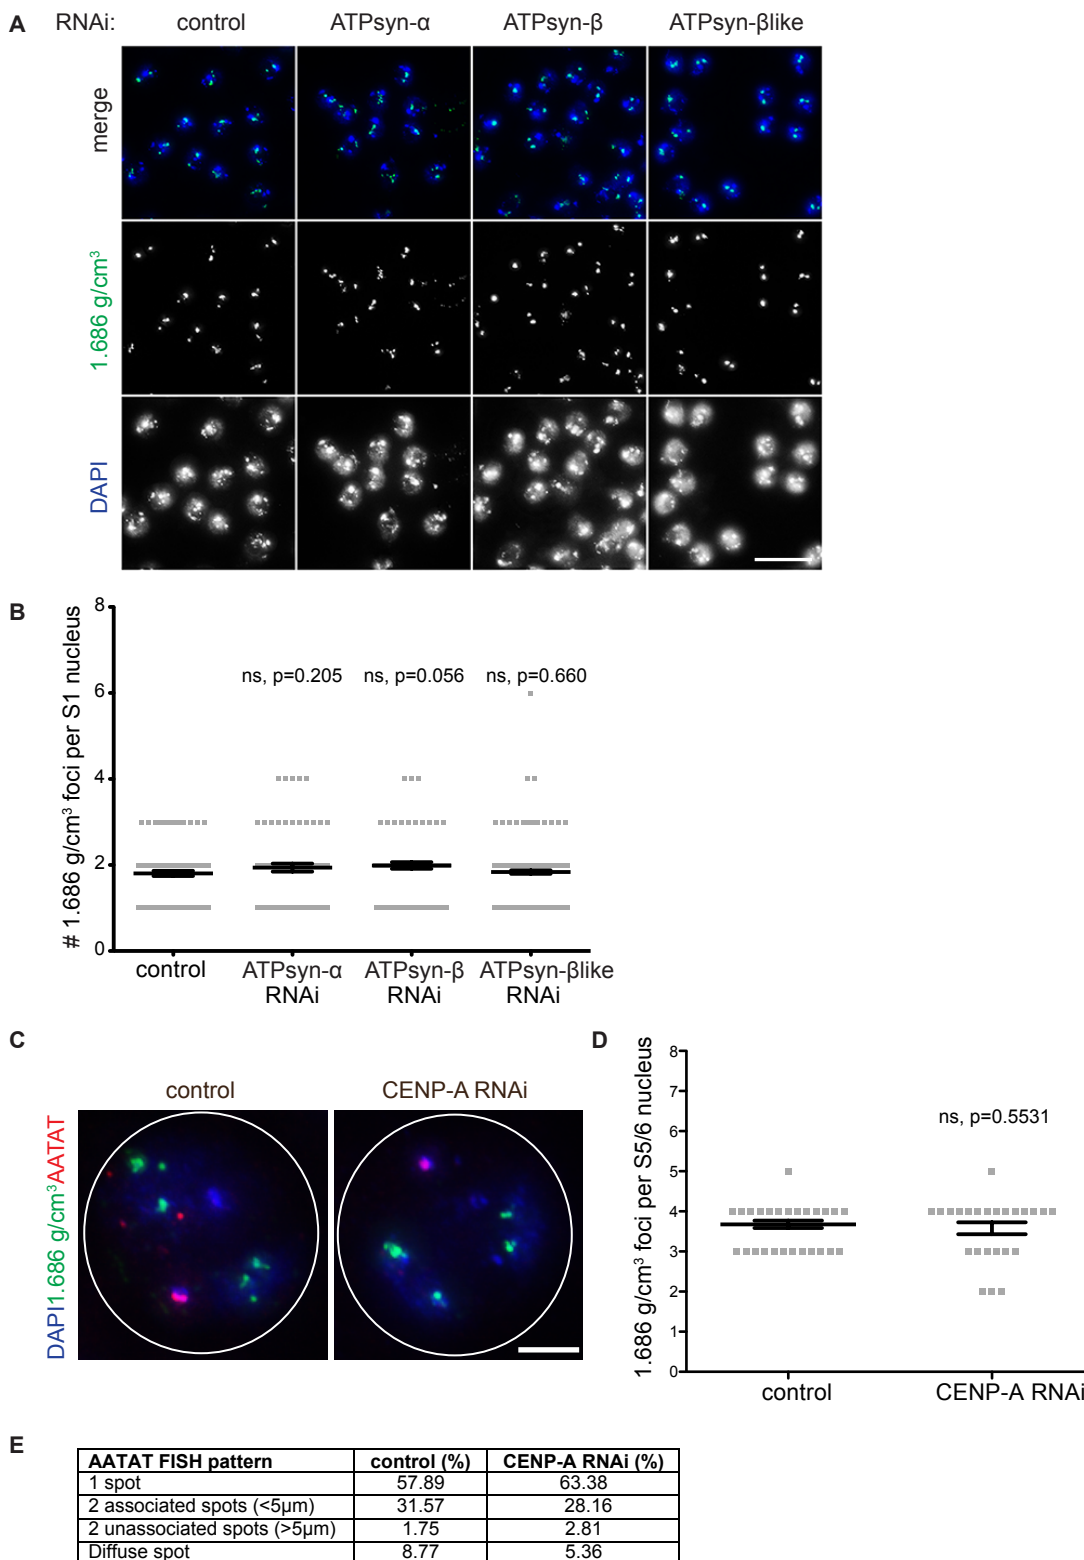

**Supplementary Figure 3. FISH upon knockdown of ATPsyn- $\alpha$ /- $\beta$ /- $\beta$ like or CENP-A.**

**A:** Micrograph of 1.686 g/cm<sup>3</sup> FISH (green) performed on control S1 nuclei or nuclei RNAi-depleted of ATPsyn- $\alpha$ , - $\beta$  or - $\beta$ like (n=3). DNA is stained with DAPI (blue). Scale bar = 10  $\mu$ m.

**B:** Quantitation of 1.686 g/cm<sup>3</sup> foci in control S1 nuclei or nuclei RNAi-depleted of ATPsyn- $\alpha$ , - $\beta$  or - $\beta$ like (data from one experiment, n=50 nuclei). Statistical significance was determined using an unpaired student's t-test. ns = p>0.05. Error bars = SEM.

**C:** Micrograph of 1.686 g/cm<sup>3</sup> (green) and of AATAT (red) FISH performed on control S5/6 nuclei or nuclei RNAi-depleted of CENP-A (n=3). DNA is stained with DAPI; white circles outline the nucleus. Scale bar = 5  $\mu$ m.

**D:** Quantitation of 1.686 g/cm<sup>3</sup> foci in control S5/6 nuclei or nuclei RNAi-depleted of CENP-A (data from one experiment, n=25 nuclei). Statistical significance was determined using an unpaired student's t-test. ns = p>0.05. Error bars = SEM.

**E:** Quantitation (% nuclei, n=30) of the AATAT hybridisation pattern in control S5/6 nuclei or nuclei RNAi-depleted of CENP-A.



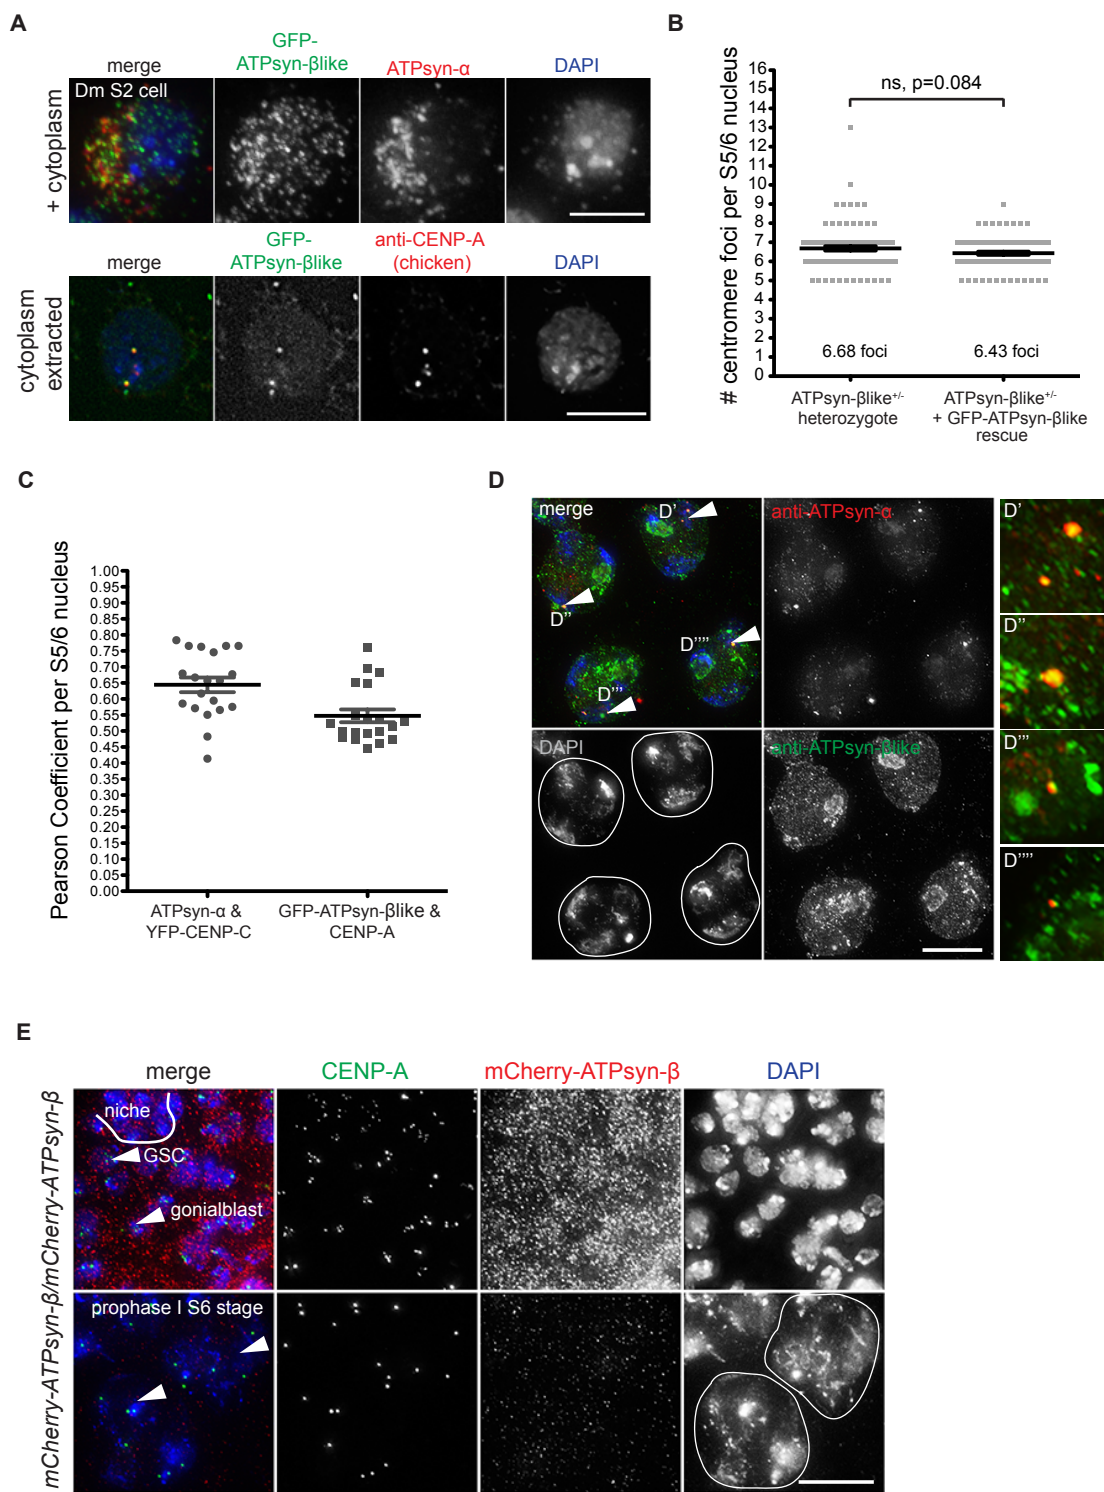

**Supplementary Figure 4. ATPsyn-α and ATPsyn-βlike localisation at centromeres.**

**A:** Top: Immuno-fluorescent micrograph of a transiently transfected *Dm* S2 cell expressing GFP-ATPsyn-βlike (green) stained with antibodies against ATPsyn-α (red) with cytoplasm intact (n=1). Bottom: Immunofluorescent micrograph of a transiently transfected *Dm* S2 cell expressing GFP-ATPsyn-βlike (green) stained with antibodies against ATPsyn-α (red) after extraction of the cytoplasm (n=3). DNA is stained with DAPI (blue). Scale bar = 5 μm.

**B:** Quantitation of the number of centromere foci per control S5/6 nuclei, or nuclei from flies lacking one functional copy of ATPsyn-βlike (ATPsyn-βlike<sup>+/-</sup> heterozygote, P element insertion) or nuclei from flies lacking one functional copy of ATPsyn-βlike expressing GFP-ATPsyn-βlike (rescue). Mean centromere foci values are indicated. Data is pooled from three individual experiments (n=100 nuclei). Statistical significance was determined using an unpaired student's t-test. ns =  $p>0.05$ . Error bars = SEM.

**C:** Pearson Coefficient per S5/6 nucleus for ATPsyn-α and YFP-CENP-C ( $0.6443 \pm \text{sd } 0.1030$ , n=20 nuclei) and GFP-ATPsyn-βlike and CENP-A ( $0.5473 \pm \text{sd } 0.0896$ , n=20 nuclei). Error bars = SEM. Scale bar = 5 μm.

**D:** Immuno-fluorescent micrograph of prophase I nuclei (S5/6 stage) stained with antibodies against ATPsyn-βlike (green) and ATPsyn-α (red) (n=3). DNA is stained with DAPI (blue). Inset panels D', D'', D''', D'''' and white arrowheads indicate overlapping foci (yellow) of ATPsyn-α and ATPsyn-βlike signals. Scale bar = 15 μm.

**E:** Immuno-fluorescent micrograph of adult testes expressing mCherry-ATPsyn-β (homozygous insertion) stained with antibodies against CENP-A (green) and RFP (red). DNA is stained with DAPI (blue). No colocalisation (n=2) was observed in germ cells indicated by white arrowheads; germ line stem cells (GSC) and gonialblast (top); prophase S5/6 nuclei (bottom). Scale bar = 10 μm.

A

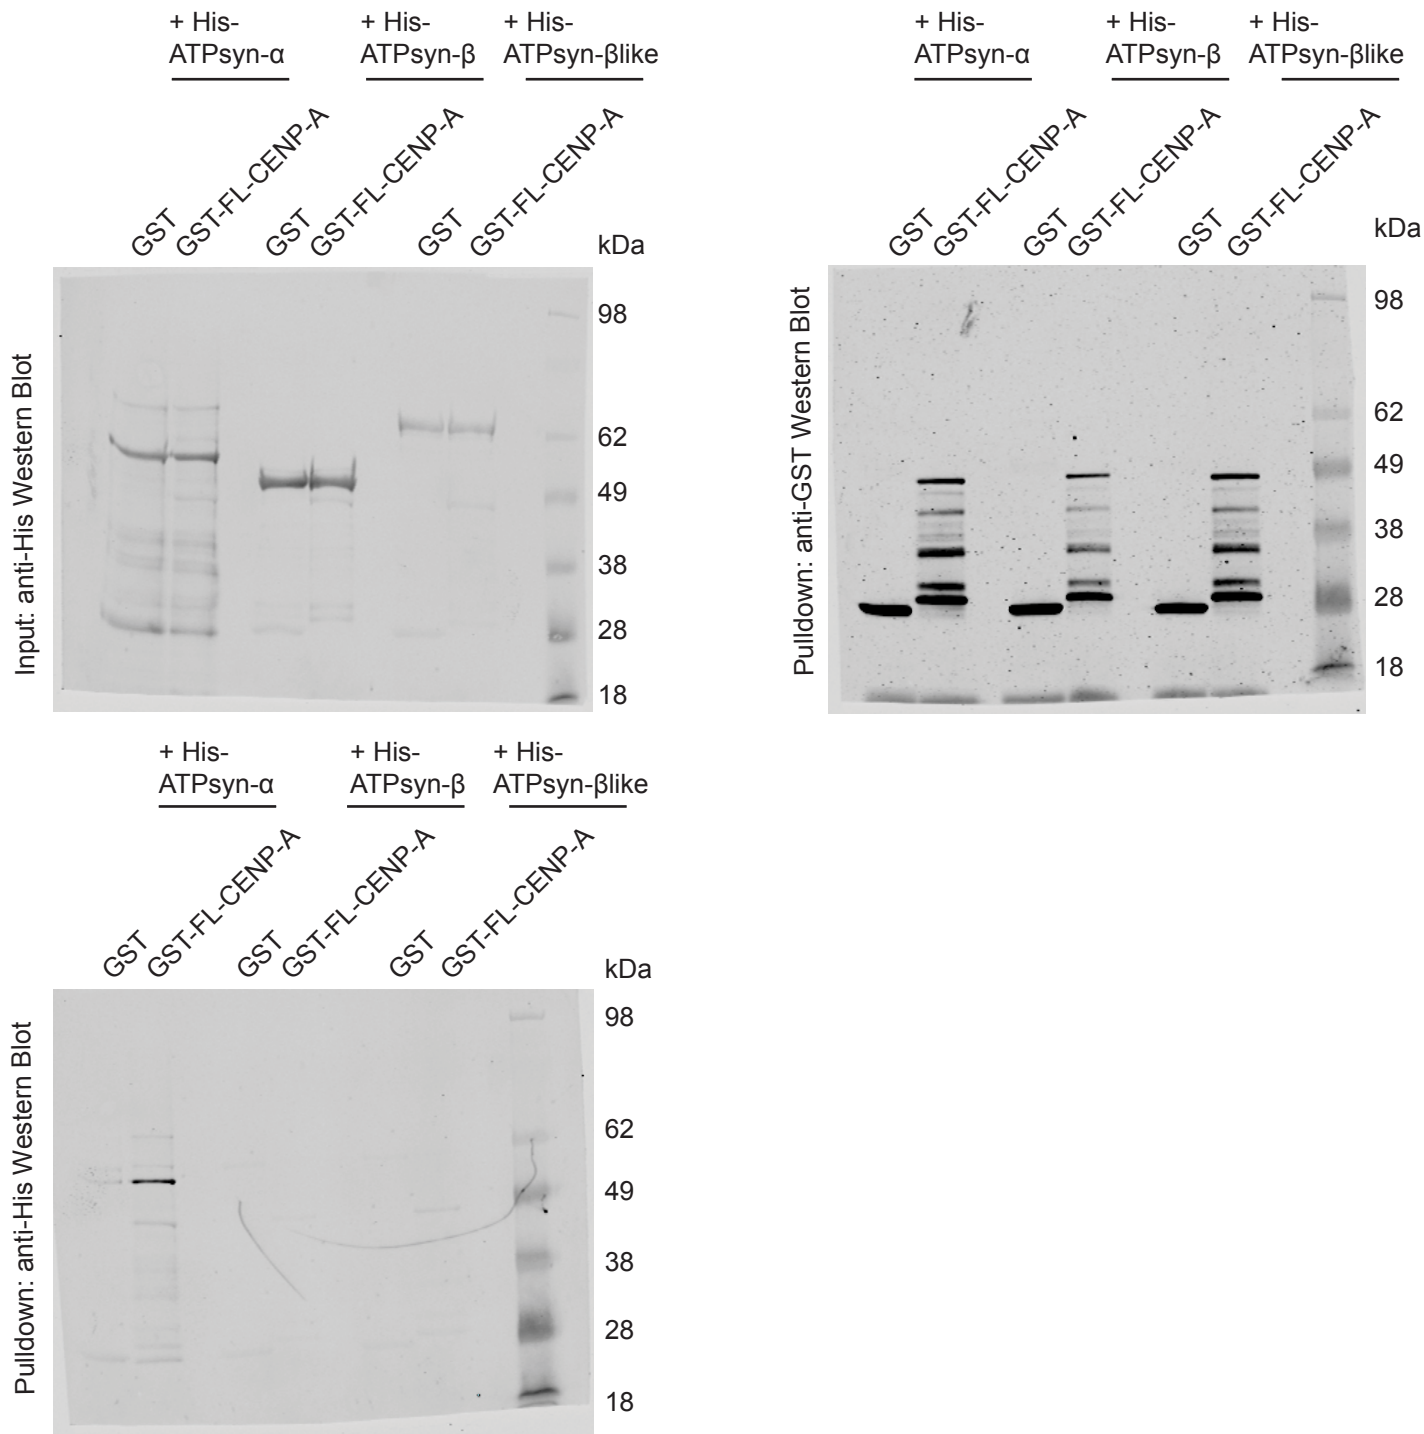

B

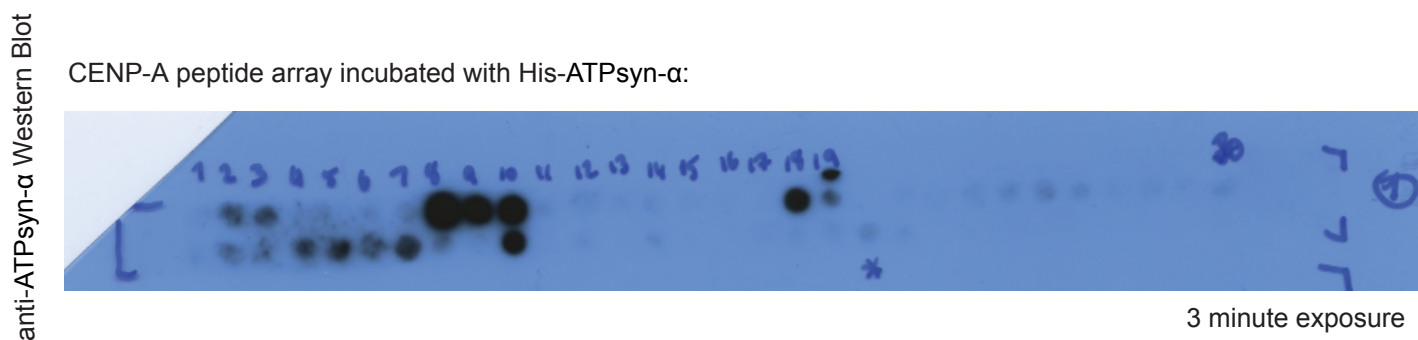

**Supplementary Figure 5. Uncropped scans of western blots.**

**A:** Related to Figure 4A. *In vitro* pull-down interaction with full-length GST-tagged CENP-A (GST-FL-CENP-A) or GST only and His-tagged ATPsyn- $\alpha$ , - $\beta$  or - $\beta$ like revealed by western analysis with anti-His antibody (input, pull-down blots shown on left) or anti-GST antibody (pull-down blot shown on right).

**B:** Related to Figure 5A. CENP-A peptide array probed with recombinant His-ATPsyn- $\alpha$ , followed by western analysis with anti-ATPsyn- $\alpha$  antibody. Spots 1-19 encompass the CENP-A N terminus (amino acids 1-126).

Supplementary Table 1. List of RNAi lines used in this study.

| Target Gene                               | Stock Number | Genotype                                              |
|-------------------------------------------|--------------|-------------------------------------------------------|
| ATPsyn- $\alpha$<br>( <i>bellwether</i> ) | BL28059      | y[1] v[1]; P{y[+7.7] v[+1.8]=TRiP.JF02896}attP2       |
| ATPsyn- $\alpha$<br>( <i>bellwether</i> ) | V34664       | w[1118]; P{GD11030}v34664                             |
| ATPsyn- $\beta$                           | BL27712      | y[1] v[1]; P{y[+7.7] v[+1.8]=TRiP.JF02792}attP2       |
| ATPsyn- $\beta$                           | V37812       | w[1118]; P{GD4967}v37812                              |
| ATPsyn- $\beta$ like                      | V22111       | w[1118]; P{GD11634}v22111/TM3                         |
| ATPsyn- $\beta$ like                      | V106718      | P{KK106259}VIE-260B                                   |
| ATPsyn- $\gamma$                          | BL50543      | y[1] v[1]; P{y[+7.7] v[+1.8]=TRiP.GLC01662}attP2      |
| ATPsyn- $\gamma$                          | V16538       | w[1118]; P{GD6339}v16538                              |
| ATPsyn-b                                  | BL28062      | y[1] v[1]; P{y[+7.7] v[+1.8]=TRiP.JF02899}attP2       |
| ND-23                                     | BL30487      | y[1] sc[*] v[1]; P{y[+7.7] v[+1.8]=TRiP.HM05229}attP2 |
| ND-51                                     | BL29534      | y[1] v[1]; P{y[+7.7] v[+1.8]=TRiP.HM05213}attP2       |
| cid ( <i>cenp-a</i> )                     | V43857       | w[1118]; P{GD4436}v43857                              |
| cid ( <i>cenp-a</i> )                     | V102090      | P{KK110670}VIE-260B                                   |
| Control (TRiP)                            | BL36303      | y[1] v[1]; P{y[+7.7]=CaryP}attP2                      |
| Control (VDRC,<br>KK library)             | V60100       | w[1118]                                               |
| Control (VDRC,<br>GD library)             | V60000       | w[1118]                                               |
